# Supplementary material for: Differences in the Bacteriome of Smokeless Tobacco Products with Different Oral Carcinogenicity: Compositional and Predicted Functional Analysis
Source: Preprints.org preprint supplement (doi:10.20944/preprints201703.0030.v1), 2017-03-06
Supplement: Supplementary file 1 [file supplementary]

## Sheet: All species identified
Species	A1	A2	A3	A4	S1	S2	S3	SuT	BS	YS	GS
Bacillus safensis/pumilus	0.581814	0.00146628	0.0780614	0.00432468	0.00375442	0	0	0	0	0	0
Bacillus clausii	0.265545	0.000733138	0.000369959	0	0.000883392	0	0	0	0.671561	0	0
Bacillus stratosphericus/altitudinis	0.0661524	0.0139296	0.0110988	0.199601	0.104019	0	0	0	0	0	0
Bacillus multispecies spp11 4	0.0364656	0.000183284	0.00110988	0.000665336	0	0	0	0	0	0	0
Bacillus pumilus	0.0345956	0.000183284	0.000369959	0.000332668	0.000441696	0	0	0	0	0	0
Bacillus clausii nov 96.01%	0.00350631	0	0	0	0	0	0	0	0	0	0
Marinilactibacillus piezotolerans nov 90.69%	0.00233754	0.00531525	0.00369959	0.00332668	0.00242933	0	0	0	0	0	0
Marinilactibacillus piezotolerans nov 90.91%	0.00210379	0.00146628	0.00258971	0.00133067	0.000883392	0	0	0	0	0	0
Kocuria rhizophila	0.000935016	0	0	0	0.00220848	0.00364551	0	0.000441501	0	0	0
Bacillus licheniformis	0.000701262	0	0	0	0	0	0	0	0	0	0
Streptococcus oralis nov 95.36%	0.000701262	0	0	0	0	0	0	0	0	0	0
Bacillus aerius	0.000467508	0.00146628	0	0.00133067	0.000220848	0	0	0	0	0	0
Neisseria multispecies spp7 2	0.000467508	0	0	0	0.000883392	0	0	0	0	0	0
Corynebacterium kroppenstedtii	0.000467508	0	0	0	0.000662544	0	0	0	0	0	0
Paracoccus siganidrum nov 93.68%	0.000467508	0	0	0	0	0	0	0	0	0	0
Aggregatibacter paraphrophilus nov 95.61%	0.000467508	0	0	0	0	0	0	0	0	0	0
Streptococcus oralis	0.000233754	0	0	0	0.000220848	0	0	0	0	0	0
Streptococcus sanguinis	0.000233754	0	0	0	0.000220848	0	0	0	0	0	0
Paracoccus siganidrum	0.000233754	0	0	0	0	0.00804525	0	0.000441501	0	0	0
Janibacter cremeus nov 96.81%	0.000233754	0	0	0	0	0	0	0	0	0	0
Bacillus licheniformis nov 96.39%	0.000233754	0	0	0	0	0	0	0	0	0	0
Bacillus multispecies sppn8 2 nov 97.98%	0.000233754	0	0	0	0	0	0	0	0	0	0
Bacillus multispecies sppn8 2 nov 99.77%	0.000233754	0	0	0	0	0	0	0	0	0	0
Abiotrophia defectiva nov 93.06%	0.000233754	0	0	0	0	0	0	0	0	0	0
Streptococcus mitis	0.000233754	0	0	0	0	0	0	0	0	0	0
Streptococcus mitis nov 96.77%	0.000233754	0	0	0	0	0	0	0	0	0	0
Streptococcus sanguinis nov 96.39%	0.000233754	0	0	0	0	0	0	0	0	0	0
Veillonella multispecies spp2 2	0.000233754	0	0	0	0	0	0	0	0	0	0
Paenibacillus barcinonensis	0	0.710227	0.00517943	0	0	0	0	0	0	0	0
Paenibacillus amylolyticus	0	0.150477	0	0	0	0	0	0	0	0	0
Paenibacillus xylanexedens	0	0.0478372	0.0466149	0	0	0	0	0	0	0	0
Paenibacillus amylolyticus nov 97.80%	0	0.0252933	0	0	0	0	0	0	0	0	0
Paenibacillus taichungensis	0	0.016129	0	0	0	0	0	0	0	0	0
Terribacillus goriensis	0	0.00733138	0.0173881	0.0149701	0.0189929	0	0	0	0	0	0
Bacillus galliciensis	0	0.00604839	0	0	0	0	0	0	0	0	0
Paenibacillus lentus nov 97.42%	0	0.00256598	0	0	0	0	0	0	0	0	0
Paenibacillus barcinonensis nov 97.98%	0	0.00164956	0	0	0	0	0	0	0	0	0
Bacillus galliciensis nov 98.61%	0	0.00128299	0	0	0	0	0	0	0	0	0
Terribacillus saccharophilus	0	0.00109971	0.00110988	0	0.000220848	0	0	0	0	0	0
Paenibacillus pabuli	0	0.000733138	0	0	0	0	0	0	0	0	0
Tetragenococcus halophilus	0	0.000549853	0.0018498	0.000665336	0.00110424	0	0	0	0	0	0
Massilia timonae	0	0.000549853	0.000369959	0.00133067	0.069788	0.211314	0.144369	0	0	0	0.000654622
Tetragenococcus osmophilus	0	0.000366569	0.00221976	0.00166334	0.000883392	0	0	0	0	0	0
Pseudomonas aeruginosa	0	0.000366569	0	0.000332668	0.0779594	0.213702	0.101474	0.000441501	0.000193199	0	0.000392773
Paenibacillus amylolyticus nov 96.60%	0	0.000366569	0	0	0	0	0	0	0	0	0
Micrococcus luteus	0	0.000183284	0	0	0.00132509	0.00150848	0.0026455	0	0	0	0
Thermus scotoductus	0	0.000183284	0	0	0.000441696	0	0	0	0	0	0
Corynebacterium ammoniagenes	0	0.000183284	0	0	0	0	0	0	0	0	0
Bacillus lehensis	0	0.000183284	0	0	0	0	0	0	0	0	0
Paenibacillus amylolyticus nov 95.60%	0	0.000183284	0	0	0	0	0	0	0	0	0
Paenibacillus barcinonensis nov 97.58%	0	0.000183284	0	0	0	0	0	0	0	0	0
Paenibacillus lentus	0	0.000183284	0	0	0	0	0	0	0	0	0
Paenibacillus lentus nov 96.42%	0	0.000183284	0	0	0	0	0	0	0	0	0
Paenibacillus multispecies spp15 2	0	0.000183284	0	0	0	0	0	0	0	0	0
Paenibacillus taichungensis nov 96.60%	0	0.000183284	0	0	0	0	0	0	0	0	0
Paenibacillus tundrae	0	0.000183284	0	0	0	0	0	0	0	0	0
Staphylococcus cohnii nov 96.97%	0	0.000183284	0	0	0	0	0	0	0	0	0
Castellaniella defragrans nov 94.27%	0	0.000183284	0	0	0	0	0	0	0	0	0
Oceanobacillus profundus	0	0	0.481687	0.595476	0.383613	0	0	0	0	0	0
Oceanobacillus massiliensis nov 96.48%	0	0	0.106548	0	0	0	0	0	0	0	0
Paenibacillus turicensis nov 96.83%	0	0	0.0710322	0	0	0	0	0	0	0	0
Paenibacillus turicensis	0	0	0.0425453	0	0	0	0	0	0	0	0
Paenibacillus barcinonensis nov 94.79%	0	0	0.036626	0	0	0	0	0	0	0	0
Paenibacillus panacisoli	0	0	0.0258972	0	0	0	0	0	0	0	0
Terribacillus saccharophilus nov 97.06%	0	0	0.018128	0.0126414	0	0	0	0.000441501	0	0	0
Oceanobacillus sojae	0	0	0.0140585	0.0229541	0.0159011	0	0	0	0	0	0
Paenibacillus illinoisensis	0	0	0.00813911	0	0	0	0	0	0	0	0
Paenibacillus massiliensis	0	0	0.00554939	0	0	0	0	0	0	0	0
Paenibacillus massiliensis nov 97.80%	0	0	0.00369959	0	0	0	0	0	0	0	0
Tetragenococcus halophilus nov 93.87%	0	0	0.00221976	0.000665336	0	0	0	0	0	0	0
Tetragenococcus osmophilus nov 93.64%	0	0	0.00221976	0.000332668	0	0	0	0	0	0	0
Oceanobacillus polygoni nov 96.27%	0	0	0.00147984	0.00499002	0	0	0	0	0	0	0
Oceanobacillus sojae nov 97.84%	0	0	0.00110988	0.00565536	0	0	0	0	0	0	0
Oceanobacillus iheyensis nov 96.87%	0	0	0.00110988	0	0	0	0	0	0	0	0
Oceanobacillus polygoni nov 92.78%	0	0	0.00110988	0	0	0	0	0	0	0	0
Oceanobacillus kimchii	0	0	0.000739919	0	0	0	0	0	0	0	0
Oceanobacillus polygoni	0	0	0.000369959	0.000332668	0.000441696	0	0	0	0	0	0
Gloeothece membranacea nov 86.56%	0	0	0.000369959	0	0.0059629	0.0437461	0.0738851	0.000441501	0	0	0.000523697
Corynebacterium casei nov 97.67%	0	0	0.000369959	0	0	0	0	0.0525386	0	0	0
Bacillus gibsonii	0	0	0.000369959	0	0	0	0	0	0	0	0
Bacillus gibsonii nov 94.61%	0	0	0.000369959	0	0	0	0	0	0	0	0
Oceanobacillus polygoni nov 89.13%	0	0	0.000369959	0	0	0	0	0	0	0	0
Oceanobacillus polygoni nov 94.21%	0	0	0.000369959	0	0	0	0	0	0	0	0
Psychrobacillus psychrodurans nov 96.81%	0	0	0.000369959	0	0	0	0	0	0	0	0
Paenibacillus panacisoli nov 97.25%	0	0	0.000369959	0	0	0	0	0	0	0	0
Citrobacter youngae	0	0	0.000369959	0	0	0	0	0	0	0	0
TM7_[G-1] sp. oral taxon 346 nov 91.62%	0	0	0.000369959	0	0	0	0	0	0	0	0
Oceanobacillus chironomi nov 97.97%	0	0	0	0.074185	0.0408569	0	0	0.0225166	0	0	0
Bacillus galactosidilyticus nov 97.97%	0	0	0	0.0316035	0.0269435	0	0	0.00529801	0	0	0
Oceanobacillus chironomi	0	0	0	0.0136394	0.0106007	0	0	0.000883002	0	0	0
Oceanobacillus caeni nov 97.47%	0	0	0	0.00199601	0.000662544	0	0	0.00397351	0	0	0
Bacillus galactosidilyticus	0	0	0	0.00166334	0.00198763	0	0	0.0203091	0	0	0
Ornithinibacillus scapharcae	0	0	0	0.00133067	0.00242933	0	0	0	0	0	0
Paenibacillus camelliae nov 97.20%	0	0	0	0.000665336	0.000662544	0	0	0	0	0	0
Ornithinibacillus californiensis nov 97.25%	0	0	0	0.000665336	0	0	0	0	0	0	0
Oceanobacillus caeni	0	0	0	0.000332668	0.000441696	0	0	0.00529801	0	0	0
Pseudomonas multispecies spp20 3	0	0	0	0.000332668	0	0.00377121	0.00604686	0	0	0	0
Corynebacterium casei nov 93.37%	0	0	0	0.000332668	0	0	0	0	0	0	0
Brachybacterium paraconglomeratum nov 95.53%	0	0	0	0.000332668	0	0	0	0	0	0	0
Moraxella osloensis	0	0	0	0	0.0295936	0	0.00963719	0	0	0	0
Propionibacterium acnes	0	0	0	0	0.0147968	0.05066	0.0846561	0.000441501	0	0	0.000130924
Bacillus alkalisediminis nov 97.59%	0	0	0	0	0.0114841	0	0	0	0	0.23898	0.901938
Bacillus okhensis/wakoensis	0	0	0	0	0.0106007	0	0	0	0	0.297105	0
Bacillus cellulosilyticus nov 97.60%	0	0	0	0	0.00817138	0	0	0	0	0.396932	0
Candidatus Puniceispirillum Puniceispirillum marinum nov 90.85%	0	0	0	0	0.00618375	0.0346952	0.186697	0	0	0	0
Brevundimonas diminuta	0	0	0	0	0.0059629	0	0	0	0	0	0
Methylobacterium variabile	0	0	0	0	0.0055212	0	0	0	0	0	0
Herpetosiphon aurantiacus	0	0	0	0	0.00441696	0.0113136	0	0	0	0	0
Sphingomonas mucosissima	0	0	0	0	0.00419611	0	0	0	0	0	0
Burkholderia multispecies spp9 2	0	0	0	0	0.00397527	0.00427404	0	0	0	0	0
Oscillibacter ruminantium nov 89.60%	0	0	0	0	0.00375442	0	0	0	0	0	0
Brevibacterium ravenspurgense	0	0	0	0	0.00353357	0	0	0	0	0	0
Faecalibacterium prausnitzii nov 97.42%	0	0	0	0	0.00331272	0	0	0	0	0	0
Rhodopseudomonas palustris nov 97.93%	0	0	0	0	0.00331272	0	0	0	0	0	0
Sphingomonas parapaucimobilis nov 96.34%	0	0	0	0	0.00331272	0	0	0	0	0	0
Delftia multispecies spp1 2	0	0	0	0	0.00309187	0.0106851	0.005291	0	0	0	0
Sphingobium quisquiliarum	0	0	0	0	0.00309187	0	0	0	0	0	0
Burkholderia multispecies spp8 5	0	0	0	0	0.00309187	0	0	0	0	0	0
Acinetobacter seohaensis	0	0	0	0	0.00287103	0.00779384	0.00151172	0	0	0	0
Enhydrobacter aerosaccus	0	0	0	0	0.00287103	0	0.00396825	0	0	0	0
Oscillibacter ruminantium nov 89.83%	0	0	0	0	0.00287103	0	0	0	0	0	0
Pseudomonas multispecies spp13 2	0	0	0	0	0.00287103	0	0	0	0	0	0
Chryseobacterium hominis	0	0	0	0	0.00265018	0.00867379	0.00151172	0	0	0	0
Rothia mucilaginosa	0	0	0	0	0.00265018	0.00817096	0	0	0	0	0
Rugamonas rubra nov 97.93%	0	0	0	0	0.00265018	0.00515399	0.00888133	0	0	0	0
Pseudomonas multispecies spp21 3	0	0	0	0	0.00242933	0.0101823	0.0032124	0	0	0	0
Pseudomonas multispecies spp23 2	0	0	0	0	0.00242933	0.00389692	0	0	0	0	0
Escherichia coli	0	0	0	0	0.00242933	0.00125707	0.000566893	0	0	0	0
Solobacterium moorei nov 89.57%	0	0	0	0	0.00242933	0	0	0	0	0	0
Alteromonas macleodii	0	0	0	0	0.00242933	0	0	0	0	0	0
Faecalibacterium prausnitzii	0	0	0	0	0.00220848	0	0	0	0	0	0
Acinetobacter junii	0	0	0	0	0.00198763	0.00339409	0.00680272	0	0	0	0
Arthrobacter flavus	0	0	0	0	0.00198763	0.0017599	0	0	0	0	0
Pseudomonas koreensis	0	0	0	0	0.00198763	0	0	0	0	0	0
Trichormus azollae nov 88.37%	0	0	0	0	0.00176678	0	0.0109599	0	0	0	0
Friedmanniella capsulata nov 97.85%	0	0	0	0	0.00176678	0	0.00359033	0	0	0	0
Georgenia muralis nov 90.64%	0	0	0	0	0.00176678	0	0	0	0	0	0
Ruminoclostridium methylpentosum	0	0	0	0	0.00176678	0	0	0	0	0	0
Massilia yuzhufengensis	0	0	0	0	0.00176678	0	0	0	0	0	0
Acinetobacter multispecies spp27 2	0	0	0	0	0.00176678	0	0	0	0	0	0
Stenotrophomonas maltophilia	0	0	0	0	0.00154594	0.00854808	0.00699169	0	0	0	0
Bergeyella sp. oral taxon 422	0	0	0	0	0.00154594	0.00477687	0	0	0	0	0
Dermacoccus barathri	0	0	0	0	0.00154594	0	0	0	0	0	0
Burkholderia cenocepacia	0	0	0	0	0.00132509	0.00339409	0	0	0	0	0
Ralstonia solanacearum nov 91.53%	0	0	0	0	0.00132509	0	0.00340136	0	0	0	0
Ferruginibacter alkalilentus nov 88.57%	0	0	0	0	0.00132509	0	0	0	0	0	0
Pantoea vagans	0	0	0	0	0.00132509	0	0	0	0	0	0
Cloacibacterium normanense	0	0	0	0	0.00110424	0.00641106	0.000188964	0	0	0	0
Corynebacterium variabile	0	0	0	0	0.00110424	0.00150848	0	0	0	0	0
Kocuria palustris	0	0	0	0	0.00110424	0	0	0	0	0	0
TM7_[G-1] sp. oral taxon 352	0	0	0	0	0.00110424	0	0	0	0	0	0
Nitrosomonas sp. AJ224410.1	0	0	0	0	0.000883392	0.00515399	0.010393	0	0	0	0
Acidovorax caeni	0	0	0	0	0.000883392	0.00465116	0	0	0	0	0
Pantoea septica	0	0	0	0	0.000883392	0.000502828	0.000566893	0	0	0	0
Cryptosporangium minutisporangium nov 95.91%	0	0	0	0	0.000883392	0	0	0	0	0	0
Knoellia locipacati	0	0	0	0	0.000883392	0	0	0	0	0	0
Deinococcus aetherius nov 93.18%	0	0	0	0	0.000883392	0	0	0	0	0	0
Oscillibacter valericigenes nov 91.15%	0	0	0	0	0.000883392	0	0	0	0	0	0
Sphingobium yanoikuyae	0	0	0	0	0.000883392	0	0	0	0	0	0
Gordonia rubripertincta nov 94.62%	0	0	0	0	0.000662544	0.00691389	0.005291	0	0	0	0
Acinetobacter bereziniae	0	0	0	0	0.000662544	0.00641106	0	0	0	0	0
Massilia timonae nov 97.93%	0	0	0	0	0.000662544	0.00201131	0.00113379	0	0	0	0
Acinetobacter johnsonii	0	0	0	0	0.000662544	0	0.00831444	0	0	0	0
Bacillus alkalisediminis	0	0	0	0	0.000662544	0	0	0	0	0.0200951	0.0958366
Actinomyces odontolyticus	0	0	0	0	0.000662544	0	0	0	0	0	0
Corynebacterium multispecies spp14 2	0	0	0	0	0.000662544	0	0	0	0	0	0
Geodermatophilus soli	0	0	0	0	0.000662544	0	0	0	0	0	0
Nocardiopsis halotolerans nov 97.27%	0	0	0	0	0.000662544	0	0	0	0	0	0
Chryseobacterium lactis	0	0	0	0	0.000662544	0	0	0	0	0	0
Streptococcus gordonii	0	0	0	0	0.000662544	0	0	0	0	0	0
Finegoldia magna	0	0	0	0	0.000662544	0	0	0	0	0	0
Treponema denticola	0	0	0	0	0.000662544	0	0	0	0	0	0
Fusobacterium multispecies spp4 3	0	0	0	0	0.000441696	0.000377121	0	0	0	0	0
Ralstonia insidiosa	0	0	0	0	0.000441696	0	0.00302343	0	0	0	0
Corynebacterium simulans	0	0	0	0	0.000441696	0	0	0	0	0	0
Microbacterium multispecies spp3 2	0	0	0	0	0.000441696	0	0	0	0	0	0
Cryobacterium mesophilum nov 78.87%	0	0	0	0	0.000441696	0	0	0	0	0	0
Microbacterium aurum	0	0	0	0	0.000441696	0	0	0	0	0	0
Weeksella virosa nov 86.38%	0	0	0	0	0.000441696	0	0	0	0	0	0
Sphingobacterium alimentarium	0	0	0	0	0.000441696	0	0	0	0	0	0
Dehalococcoides multispecies sppn8 3 nov 86.07%	0	0	0	0	0.000441696	0	0	0	0	0	0
Dorea formicigenerans	0	0	0	0	0.000441696	0	0	0	0	0	0
Peptoniphilus harei	0	0	0	0	0.000441696	0	0	0	0	0	0
Acidovorax multispecies spp10 2	0	0	0	0	0.000441696	0	0	0	0	0	0
Atopostipes suicloacalis nov 96.98%	0	0	0	0	0.000220848	0.00364551	0	0.0543046	0	0	0
Acinetobacter seohaensis nov 97.34%	0	0	0	0	0.000220848	0.00301697	0	0	0	0	0
Propionibacterium granulosum	0	0	0	0	0.000220848	0	0.00547997	0	0	0	0
Lautropia mirabilis	0	0	0	0	0.000220848	0	0.00226757	0	0	0	0
Oceanitalea nanhaiensis nov 97.45%	0	0	0	0	0.000220848	0	0	0	0	0	0
Curtobacterium plantarum	0	0	0	0	0.000220848	0	0	0	0	0	0
Capnocytophaga granulosa nov 96.86%	0	0	0	0	0.000220848	0	0	0	0	0	0
Gloeothece membranacea nov 85.68%	0	0	0	0	0.000220848	0	0	0	0	0	0
Staphylococcus epidermidis	0	0	0	0	0.000220848	0	0	0	0	0	0
Oscillibacter valericigenes nov 89.75%	0	0	0	0	0.000220848	0	0	0	0	0	0
Ruminoclostridium thermocellum	0	0	0	0	0.000220848	0	0	0	0	0	0
Catenibacterium mitsuokai nov 97.94%	0	0	0	0	0.000220848	0	0	0	0	0	0
Peptoniphilus indolicus	0	0	0	0	0.000220848	0	0	0	0	0	0
Azospirillum brasilense nov 89.68%	0	0	0	0	0.000220848	0	0	0	0	0	0
Sphingobium yanoikuyae nov 97.09%	0	0	0	0	0.000220848	0	0	0	0	0	0
Achromobacter multispecies spp5 2	0	0	0	0	0.000220848	0	0	0	0	0	0
Comamonas badia nov 95.51%	0	0	0	0	0.000220848	0	0	0	0	0	0
Acinetobacter bereziniae nov 95.36%	0	0	0	0	0.000220848	0	0	0	0	0	0
Acinetobacter gerneri	0	0	0	0	0.000220848	0	0	0	0	0	0
Acinetobacter gyllenbergii nov 97.69%	0	0	0	0	0.000220848	0	0	0	0	0	0
Acinetobacter ursingii	0	0	0	0	0.000220848	0	0	0	0	0	0
Pseudomonas stutzeri	0	0	0	0	0.000220848	0	0	0	0	0	0
Methylobacterium zatmanii	0	0	0	0	0	0.0238843	0.0287226	0	0	0	0
Bradyrhizobium sp. str. LMG10689	0	0	0	0	0	0.0148334	0.0120937	0	0	0	0
Paenirhodobacter enshiensis nov 97.92%	0	0	0	0	0	0.0148334	0	0	0	0	0
Blastococcus saxobsidens	0	0	0	0	0	0.0125707	0.000755858	0	0	0	0
Hephaestia caeni nov 97.92%	0	0	0	0	0	0.0121936	0	0	0	0	0
Terrisporobacter mayombei	0	0	0	0	0	0.0106851	0	0	0	0	0
Microbacterium barkeri nov 96.79%	0	0	0	0	0	0.00980515	0	0	0	0	0
Bradyrhizobium multispecies spp26 4	0	0	0	0	0	0.00967945	0.00283447	0	0	0	0
Roseomonas mucosa	0	0	0	0	0	0.00867379	0	0	0	0	0
Sphingomonas multispecies spp24 2	0	0	0	0	0	0.00829667	0	0	0	0	0
Hellea balneolensis nov 88.44%	0	0	0	0	0	0.00817096	0	0	0	0	0
Sphingomonas sediminicola	0	0	0	0	0	0.00791955	0	0	0	0	0
Massilia yuzhufengensis nov 97.31%	0	0	0	0	0	0.00653677	0.00415722	0	0	0	0
Fusobacterium periodonticum	0	0	0	0	0	0.00615965	0	0	0	0	0
Bosea multispecies spp6 3	0	0	0	0	0	0.00502828	0	0	0	0	0
Cupriavidus metallidurans	0	0	0	0	0	0.00477687	0	0	0	0	0
Sphingomonas multispecies sppn8 2 nov 96.75%	0	0	0	0	0	0.00439975	0.0058579	0	0	0	0
Neorhizobium galegae nov 93.27%	0	0	0	0	0	0.00427404	0	0	0	0	0
Sphingomonas echinoides	0	0	0	0	0	0.00414833	0	0	0	0	0
Propionibacterium sp. oral taxon 193	0	0	0	0	0	0.00402263	0.00207861	0	0	0	0
Gordonia sputi	0	0	0	0	0	0.00402263	0	0	0	0	0
Empedobacter falsenii nov 96.88%	0	0	0	0	0	0.00402263	0	0	0	0	0
Coprococcus comes nov 96.46%	0	0	0	0	0	0.00402263	0	0	0	0	0
Tetrasphaera remsis	0	0	0	0	0	0.00364551	0	0	0	0	0
Azonexus caeni nov 95.07%	0	0	0	0	0	0.00364551	0	0	0	0	0
Coprococcus comes nov 96.66%	0	0	0	0	0	0.0035198	0	0	0	0	0
Leptotrichia hofstadii	0	0	0	0	0	0.0035198	0	0	0	0	0
Pseudomonas mosselii	0	0	0	0	0	0.0035198	0	0	0	0	0
Rothia dentocariosa	0	0	0	0	0	0.00301697	0	0	0	0	0
Methylobacterium salsuginis nov 97.22%	0	0	0	0	0	0.00301697	0	0	0	0	0
Streptococcus thermophilus	0	0	0	0	0	0.00276556	0	0	0	0	0
Comamonas aquatica	0	0	0	0	0	0.00276556	0	0	0	0	0
Sporobacter termitidis nov 86.58%	0	0	0	0	0	0.00263985	0	0	0	0	0
Acinetobacter bereziniae nov 95.90%	0	0	0	0	0	0.00251414	0	0	0	0	0
Haemophilus parainfluenzae	0	0	0	0	0	0.00238843	0.000944822	0	0	0	0
Dehalococcoides multispecies sppn8 4 nov 81.84%	0	0	0	0	0	0.00238843	0	0	0	0	0
Vallitalea guaymasensis nov 84.89%	0	0	0	0	0	0.00238843	0	0	0	0	0
Corynebacterium amycolatum	0	0	0	0	0	0.00226273	0	0	0	0	0
Corynebacterium propinquum	0	0	0	0	0	0.00226273	0	0	0	0	0
Prevotella melaninogenica	0	0	0	0	0	0.00226273	0	0	0	0	0
Cloacibacterium haliotis nov 97.50%	0	0	0	0	0	0.00226273	0	0	0	0	0
Mycobacterium iranicum	0	0	0	0	0	0.00213702	0	0	0	0	0
Sphingomonas paucimobilis	0	0	0	0	0	0.00201131	0.0173847	0	0	0	0
Prevotella copri nov 97.56%	0	0	0	0	0	0.00201131	0	0	0	0	0
Dehalogenimonas alkenigignens nov 85.15%	0	0	0	0	0	0.00201131	0	0	0	0	0
Acidimicrobium ferrooxidans nov 79.90%	0	0	0	0	0	0.00188561	0	0	0	0	0
Corynebacterium striatum	0	0	0	0	0	0.0017599	0	0	0	0	0
Aquipuribacter hungaricus nov 96.34%	0	0	0	0	0	0.0017599	0	0	0	0	0
Georgenia muralis	0	0	0	0	0	0.00163419	0	0	0	0	0
Flexivirga alba nov 95.34%	0	0	0	0	0	0.00163419	0	0	0	0	0
Nocardioides marinus nov 97.01%	0	0	0	0	0	0.00163419	0	0	0	0	0
Eikenella multispecies sppn8 2 nov 88.62%	0	0	0	0	0	0.00163419	0	0	0	0	0
Acinetobacter baumannii	0	0	0	0	0	0.00163419	0	0	0	0	0
Acinetobacter baumannii nov 96.10%	0	0	0	0	0	0.00163419	0	0	0	0	0
Anaerocella delicata nov 87.53%	0	0	0	0	0	0.00150848	0	0	0	0	0
Treponema berlinense	0	0	0	0	0	0.00150848	0	0	0	0	0
Cloacibacterium rupense	0	0	0	0	0	0.00138278	0.00302343	0	0	0	0
Veillonella tobetsuensis	0	0	0	0	0	0.00138278	0	0	0	0	0
Achromobacter xylosoxidans	0	0	0	0	0	0.00138278	0	0	0	0	0
Empedobacter falsenii nov 96.03%	0	0	0	0	0	0.00125707	0	0	0	0	0
Aggregatibacter sp. oral taxon 513	0	0	0	0	0	0.00125707	0	0	0	0	0
Dermacoccus nishinomiyaensis	0	0	0	0	0	0.00113136	0	0	0	0	0
Intestinimonas butyriciproducens nov 88.09%	0	0	0	0	0	0.00113136	0	0	0	0	0
Faecalibacterium prausnitzii nov 97.64%	0	0	0	0	0	0.00113136	0	0	0	0	0
Erythrobacter gaetbuli	0	0	0	0	0	0.00113136	0	0	0	0	0
Pseudomonas fluorescens	0	0	0	0	0	0.00113136	0	0	0	0	0
Corynebacterium pyruviciproducens	0	0	0	0	0	0.00100566	0	0	0	0	0
Ruminococcaceae_[G-2] sp. oral taxon 085	0	0	0	0	0	0.00100566	0	0	0	0	0
Rothia aeria	0	0	0	0	0	0.00087995	0	0	0	0	0
Terrisporobacter mayombei nov 97.79%	0	0	0	0	0	0.00087995	0	0	0	0	0
Klebsiella pneumoniae	0	0	0	0	0	0.00087995	0	0	0	0	0
Sporichthya polymorpha nov 80.71%	0	0	0	0	0	0.000754243	0	0	0	0	0
Ferruginibacter alkalilentus nov 88.98%	0	0	0	0	0	0.000754243	0	0	0	0	0
Ottowia sp. oral taxon 894 nov 92.06%	0	0	0	0	0	0.000754243	0	0	0	0	0
Terrabacter tumescens	0	0	0	0	0	0.000628536	0	0	0	0	0
Aciditerrimonas ferrireducens nov 88.73%	0	0	0	0	0	0.000502828	0	0	0	0	0
Mycobacterium iranicum nov 97.79%	0	0	0	0	0	0.000502828	0	0	0	0	0
Neisseria sicca	0	0	0	0	0	0.000502828	0	0	0	0	0
Bacteroidetes_[G-7] sp. oral taxon 911 nov 90.06%	0	0	0	0	0	0.000377121	0	0	0	0	0
Prevotella copri nov 97.76%	0	0	0	0	0	0.000377121	0	0	0	0	0
Alloiococcus otitis	0	0	0	0	0	0.000377121	0	0	0	0	0
Acidovorax temperans	0	0	0	0	0	0.000377121	0	0	0	0	0
Corynebacterium pyruviciproducens nov 97.84%	0	0	0	0	0	0.000251414	0	0	0	0	0
Staphylococcus haemolyticus	0	0	0	0	0	0.000251414	0	0	0	0	0
Aeromonas taiwanensis	0	0	0	0	0	0.000251414	0	0	0	0	0
Acinetobacter tandoii nov 95.88%	0	0	0	0	0	0.000251414	0	0	0	0	0
Marinomonas arenicola nov 96.93%	0	0	0	0	0	0.000125707	0.000755858	0	0	0	0
Corynebacterium striatum nov 92.11%	0	0	0	0	0	0.000125707	0	0	0	0	0
Rothia mucilaginosa nov 95.95%	0	0	0	0	0	0.000125707	0	0	0	0	0
Micrococcus luteus nov 96.58%	0	0	0	0	0	0.000125707	0	0	0	0	0
Kurthia gibsonii	0	0	0	0	0	0.000125707	0	0	0	0	0
Solobacterium moorei nov 88.46%	0	0	0	0	0	0.000125707	0	0	0	0	0
Methylobacterium multispecies spp19 2	0	0	0	0	0	0.000125707	0	0	0	0	0
Burkholderia multivorans	0	0	0	0	0	0.000125707	0	0	0	0	0
Sphingomonas changbaiensis	0	0	0	0	0	0	0.0192744	0	0	0	0
Paracoccus kocurii	0	0	0	0	0	0	0.0136054	0	0	0	0
Nisaea multispecies sppn8 2 nov 87.50%	0	0	0	0	0	0	0.0117158	0	0	0	0
Leptotrichia sp. oral taxon 212	0	0	0	0	0	0	0.0115268	0	0	0	0
Pelagibacter ubique	0	0	0	0	0	0	0.00982615	0	0	0	0
Tepidicella xavieri	0	0	0	0	0	0	0.00963719	0	0	0	0
Methylobacterium aerolatum	0	0	0	0	0	0	0.00755858	0	0	0	0
Paracoccus kocurii nov 97.69%	0	0	0	0	0	0	0.00755858	0	0	0	0
Sphingomonas phyllosphaerae nov 96.10%	0	0	0	0	0	0	0.00699169	0	0	0	0
Sphaerobacter thermophilus nov 84.57%	0	0	0	0	0	0	0.00680272	0	0	0	0
Synechococcus sp. str. CC9902	0	0	0	0	0	0	0.00680272	0	0	0	0
Streptomyces humidus	0	0	0	0	0	0	0.00661376	0	0	0	0
Methylobacterium longum	0	0	0	0	0	0	0.00642479	0	0	0	0
Microbacterium deminutum	0	0	0	0	0	0	0.00491308	0	0	0	0
Aquipuribacter hungaricus nov 95.67%	0	0	0	0	0	0	0.00453515	0	0	0	0
Rothia amarae nov 96.42%	0	0	0	0	0	0	0.00434618	0	0	0	0
Chryseobacterium haifense nov 97.29%	0	0	0	0	0	0	0.00396825	0	0	0	0
Truepera radiovictrix nov 90.11%	0	0	0	0	0	0	0.00396825	0	0	0	0
Faecalibacterium prausnitzii nov 97.01%	0	0	0	0	0	0	0.00396825	0	0	0	0
Rhodopseudomonas pentothenatexigens	0	0	0	0	0	0	0.00396825	0	0	0	0
Paracoccus yeei	0	0	0	0	0	0	0.00377929	0	0	0	0
Ideonella dechloratans	0	0	0	0	0	0	0.00359033	0	0	0	0
Streptomyces ziwulingensis	0	0	0	0	0	0	0.00340136	0	0	0	0
Methylobacterium populi	0	0	0	0	0	0	0.0032124	0	0	0	0
Ruminococcaceae_[G-2] sp. oral taxon 085 nov 91.19%	0	0	0	0	0	0	0.00283447	0	0	0	0
Capnocytophaga sp. oral taxon 336	0	0	0	0	0	0	0.00245654	0	0	0	0
Corynebacterium imitans	0	0	0	0	0	0	0.00226757	0	0	0	0
Corynebacterium massiliense	0	0	0	0	0	0	0.00226757	0	0	0	0
Nocardia ninae nov 78.99%	0	0	0	0	0	0	0.00207861	0	0	0	0
Streptomyces hygroscopicus	0	0	0	0	0	0	0.00207861	0	0	0	0
Alistipes onderdonkii nov 90.69%	0	0	0	0	0	0	0.00188964	0	0	0	0
Microvirga aerophila nov 96.07%	0	0	0	0	0	0	0.00188964	0	0	0	0
Brachybacterium multispecies spp16 2	0	0	0	0	0	0	0.00170068	0.00264901	0	0	0
Acinetobacter baumannii nov 94.90%	0	0	0	0	0	0	0.00170068	0	0	0	0
Curtobacterium flaccumfaciens	0	0	0	0	0	0	0.00151172	0	0	0	0
Corynebacterium accolens	0	0	0	0	0	0	0.00132275	0	0	0	0
Corynebacterium suicordis	0	0	0	0	0	0	0.00132275	0	0	0	0
Capnocytophaga gingivalis nov 95.06%	0	0	0	0	0	0	0.00132275	0	0	0	0
Algibacter undariae nov 89.23%	0	0	0	0	0	0	0.00132275	0	0	0	0
Acinetobacter lwoffii	0	0	0	0	0	0	0.00132275	0	0	0	0
Branchiibius hedensis nov 96.84%	0	0	0	0	0	0	0.00113379	0	0	0	0
Intestinimonas butyriciproducens nov 88.98%	0	0	0	0	0	0	0.00113379	0	0	0	0
Beijerinckia mobilis nov 96.55%	0	0	0	0	0	0	0.00113379	0	0	0	0
Paracoccus kocurii nov 97.47%	0	0	0	0	0	0	0.00113379	0	0	0	0
Acinetobacter schindleri	0	0	0	0	0	0	0.00113379	0	0	0	0
Aerococcus viridans	0	0	0	0	0	0	0.000944822	0	0	0	0
Hathewaya histolytica	0	0	0	0	0	0	0.000944822	0	0	0	0
Lacnoclostridium sp. SS3/4 nov 91.94%	0	0	0	0	0	0	0.000944822	0	0	0	0
Alcaligenes sp. str. CO14	0	0	0	0	0	0	0.000755858	0.000441501	0	0	0
Brachybacterium muris	0	0	0	0	0	0	0.000755858	0	0	0	0
Slackia exigua nov 81.22%	0	0	0	0	0	0	0.000755858	0	0	0	0
Phascolarctobacterium sp. str. YIT12067 nov 96.60%	0	0	0	0	0	0	0.000755858	0	0	0	0
Veillonella parvula	0	0	0	0	0	0	0.000755858	0	0	0	0
Pectobacterium carotovorum	0	0	0	0	0	0	0.000755858	0	0	0	0
Aquihabitans daechungensis nov 94.08%	0	0	0	0	0	0	0.000566893	0	0	0	0
Gloeothece membranacea nov 85.27%	0	0	0	0	0	0	0.000566893	0	0	0	0
Oscillibacter valericigenes nov 92.80%	0	0	0	0	0	0	0.000566893	0	0	0	0
Ideonella dechloratans nov 97.92%	0	0	0	0	0	0	0.000566893	0	0	0	0
Actinomyces radicidentis	0	0	0	0	0	0	0.000377929	0	0	0	0
Gordonia hydrophobica	0	0	0	0	0	0	0.000377929	0	0	0	0
Curtobacterium flaccumfaciens nov 97.86%	0	0	0	0	0	0	0.000377929	0	0	0	0
Eubacterium coprostanoligenes nov 91.08%	0	0	0	0	0	0	0.000377929	0	0	0	0
Ruminococcaceae_[G-2] sp. oral taxon 085 nov 90.55%	0	0	0	0	0	0	0.000377929	0	0	0	0
Pirellula staleyi nov 85.47%	0	0	0	0	0	0	0.000377929	0	0	0	0
Pantoea agglomerans	0	0	0	0	0	0	0.000377929	0	0	0	0
Pantoea eucrina	0	0	0	0	0	0	0.000377929	0	0	0	0
Rosenbergiella epipactidis	0	0	0	0	0	0	0.000377929	0	0	0	0
Mycobacterium sp. str. HE5	0	0	0	0	0	0	0.000188964	0	0	0	0
Solirubrobacter ginsenosidimutans nov 94.37%	0	0	0	0	0	0	0.000188964	0	0	0	0
Prevotella stercorea nov 95.69%	0	0	0	0	0	0	0.000188964	0	0	0	0
Sphaerobacter thermophilus nov 83.05%	0	0	0	0	0	0	0.000188964	0	0	0	0
Staphylococcus saprophyticus	0	0	0	0	0	0	0.000188964	0	0	0	0
Catonella morbi	0	0	0	0	0	0	0.000188964	0	0	0	0
Gimesia maris	0	0	0	0	0	0	0.000188964	0	0	0	0
Bradyrhizobium daqingense	0	0	0	0	0	0	0.000188964	0	0	0	0
Ralstonia sp. oral taxon 406	0	0	0	0	0	0	0.000188964	0	0	0	0
Neisseria multispecies spp18 2	0	0	0	0	0	0	0.000188964	0	0	0	0
Cardiobacterium hominis nov 95.96%	0	0	0	0	0	0	0.000188964	0	0	0	0
Raoultella terrigena	0	0	0	0	0	0	0.000188964	0	0	0	0
Pseudomonas fuscovaginae	0	0	0	0	0	0	0.000188964	0	0	0	0
Pseudomonas multispecies spp22 4	0	0	0	0	0	0	0.000188964	0	0	0	0
Desemzia incerta nov 96.59%	0	0	0	0	0	0	0	0.351435	0	0	0
Facklamia tabacinasalis	0	0	0	0	0	0	0	0.125386	0	0	0
Lysinibacillus chungkukjangi nov 96.21%	0	0	0	0	0	0	0	0.122737	0	0	0
Desemzia incerta nov 89.86%	0	0	0	0	0	0	0	0.0229581	0	0	0
Desemzia incerta nov 94.69%	0	0	0	0	0	0	0	0.0225166	0	0	0
Lysinibacillus massiliensis nov 97.99%	0	0	0	0	0	0	0	0.0211921	0	0	0
Corynebacterium stationis	0	0	0	0	0	0	0	0.0203091	0	0	0
Desemzia incerta	0	0	0	0	0	0	0	0.0172185	0	0	0
Corynebacterium halotolerans nov 94.88%	0	0	0	0	0	0	0	0.013245	0	0	0
Lysobacter defluvii	0	0	0	0	0	0	0	0.012362	0	0	0
Lysinibacillus pakistanensis nov 96.19%	0	0	0	0	0	0	0	0.0101545	0	0	0
Atopostipes suicloacalis	0	0	0	0	0	0	0	0.00883002	0	0	0
Sporosarcina contaminans	0	0	0	0	0	0	0	0.00706402	0	0	0
Lysinibacillus massiliensis nov 97.38%	0	0	0	0	0	0	0	0.00618101	0	0	0
Facklamia tabacinasalis nov 88.95%	0	0	0	0	0	0	0	0.00529801	0	0	0
Oceanobacillus oncorhynchi	0	0	0	0	0	0	0	0.00485651	0	0	0
Oceanitalea nanhaiensis nov 96.83%	0	0	0	0	0	0	0	0.00397351	0	0	0
Atopococcus tabaci nov 91.46%	0	0	0	0	0	0	0	0.00397351	0	0	0
Enteractinococcus coprophilus nov 96.02%	0	0	0	0	0	0	0	0.00353201	0	0	0
Sphingobacterium arenae nov 93.95%	0	0	0	0	0	0	0	0.00309051	0	0	0
Atopostipes suicloacalis nov 95.78%	0	0	0	0	0	0	0	0.00309051	0	0	0
Ochrobactrum oryzae nov 96.54%	0	0	0	0	0	0	0	0.00264901	0	0	0
Bacillus galactosidilyticus nov 96.15%	0	0	0	0	0	0	0	0.001766	0	0	0
Oceanobacillus caeni nov 97.27%	0	0	0	0	0	0	0	0.001766	0	0	0
Ornithinibacillus scapharcae nov 94.92%	0	0	0	0	0	0	0	0.001766	0	0	0
Ochrobactrum oryzae	0	0	0	0	0	0	0	0.001766	0	0	0
Brevibacterium senegalense	0	0	0	0	0	0	0	0.0013245	0	0	0
Bacillus subtilis nov 95.80%	0	0	0	0	0	0	0	0.0013245	0	0	0
Facklamia tabacinasalis nov 95.62%	0	0	0	0	0	0	0	0.0013245	0	0	0
Arthrobacter creatinolyticus	0	0	0	0	0	0	0	0.000883002	0	0	0
Bacillus endophyticus	0	0	0	0	0	0	0	0.000883002	0	0	0
Oceanobacillus caeni nov 95.52%	0	0	0	0	0	0	0	0.000883002	0	0	0
Paenibacillus lactis	0	0	0	0	0	0	0	0.000883002	0	0	0
Sporosarcina contaminans nov 97.56%	0	0	0	0	0	0	0	0.000883002	0	0	0
Staphylococcus cohnii	0	0	0	0	0	0	0	0.000883002	0	0	0
Pelagibacterium halotolerans nov 95.85%	0	0	0	0	0	0	0	0.000883002	0	0	0
Tistlia consotensis nov 92.17%	0	0	0	0	0	0	0	0.000883002	0	0	0
Lysobacter defluvii nov 94.29%	0	0	0	0	0	0	0	0.000883002	0	0	0
Corynebacterium ammoniagenes nov 97.01%	0	0	0	0	0	0	0	0.000441501	0	0	0
Oceanitalea nanhaiensis	0	0	0	0	0	0	0	0.000441501	0	0	0
Oceanitalea nanhaiensis nov 97.04%	0	0	0	0	0	0	0	0.000441501	0	0	0
Tetrasphaera japonica nov 91.33%	0	0	0	0	0	0	0	0.000441501	0	0	0
Leucobacter margaritiformis nov 95.96%	0	0	0	0	0	0	0	0.000441501	0	0	0
Sphingobacterium arenae nov 92.21%	0	0	0	0	0	0	0	0.000441501	0	0	0
Synechococcus sp. str. RS9916 nov 84.90%	0	0	0	0	0	0	0	0.000441501	0	0	0
Bacillus oleronius nov 91.27%	0	0	0	0	0	0	0	0.000441501	0	0	0
Bacillus thermoamylovorans	0	0	0	0	0	0	0	0.000441501	0	0	0
Lysinibacillus massiliensis nov 96.59%	0	0	0	0	0	0	0	0.000441501	0	0	0
Lysinibacillus pakistanensis nov 94.01%	0	0	0	0	0	0	0	0.000441501	0	0	0
Oceanobacillus caeni nov 93.59%	0	0	0	0	0	0	0	0.000441501	0	0	0
Ornithinibacillus californiensis nov 90.48%	0	0	0	0	0	0	0	0.000441501	0	0	0
Paenibacillus anaericanus nov 96.81%	0	0	0	0	0	0	0	0.000441501	0	0	0
Paenibacillus macerans nov 92.64%	0	0	0	0	0	0	0	0.000441501	0	0	0
Paenibacillus provencensis nov 91.11%	0	0	0	0	0	0	0	0.000441501	0	0	0
Sporosarcina contaminans nov 92.29%	0	0	0	0	0	0	0	0.000441501	0	0	0
Staphylococcus xylosus nov 92.60%	0	0	0	0	0	0	0	0.000441501	0	0	0
Facklamia tabacinasalis nov 92.42%	0	0	0	0	0	0	0	0.000441501	0	0	0
Atopostipes suicloacalis nov 94.19%	0	0	0	0	0	0	0	0.000441501	0	0	0
Atopostipes suicloacalis nov 95.62%	0	0	0	0	0	0	0	0.000441501	0	0	0
Desemzia incerta nov 90.89%	0	0	0	0	0	0	0	0.000441501	0	0	0
Desemzia incerta nov 91.96%	0	0	0	0	0	0	0	0.000441501	0	0	0
Desemzia incerta nov 92.48%	0	0	0	0	0	0	0	0.000441501	0	0	0
Desemzia incerta nov 92.53%	0	0	0	0	0	0	0	0.000441501	0	0	0
Desemzia incerta nov 93.11%	0	0	0	0	0	0	0	0.000441501	0	0	0
Desemzia incerta nov 94.81%	0	0	0	0	0	0	0	0.000441501	0	0	0
Lacticigenium naphtae nov 90.76%	0	0	0	0	0	0	0	0.000441501	0	0	0
Aureimonas frigidaquae	0	0	0	0	0	0	0	0.000441501	0	0	0
Ochrobactrum oryzae nov 97.67%	0	0	0	0	0	0	0	0.000441501	0	0	0
Ochrobactrum oryzae nov 97.92%	0	0	0	0	0	0	0	0.000441501	0	0	0
Devosia albogilva	0	0	0	0	0	0	0	0.000441501	0	0	0
Paracoccus chinensis	0	0	0	0	0	0	0	0.000441501	0	0	0
Parapusillimonas granuli	0	0	0	0	0	0	0	0.000441501	0	0	0
Parapusillimonas granuli nov 96.88%	0	0	0	0	0	0	0	0.000441501	0	0	0
Halomonas organivorans nov 97.34%	0	0	0	0	0	0	0	0.000441501	0	0	0
Pseudomonas lutea nov 97.50%	0	0	0	0	0	0	0	0.000441501	0	0	0
Pseudomonas xiamenensis nov 97.10%	0	0	0	0	0	0	0	0.000441501	0	0	0
Luteimonas multispecies sppn8 2 nov 89.09%	0	0	0	0	0	0	0	0.000441501	0	0	0
Luteimonas terricola nov 93.95%	0	0	0	0	0	0	0	0.000441501	0	0	0
Lysobacter defluvii nov 96.24%	0	0	0	0	0	0	0	0.000441501	0	0	0
Bacillus persicus nov 96.79%	0	0	0	0	0	0	0	0	0.293856	0	0
Bacillus clausii nov 97.19%	0	0	0	0	0	0	0	0	0.0226043	0	0
Bacillus persicus nov 94.82%	0	0	0	0	0	0	0	0	0.00482999	0	0
Bacillus persicus nov 96.38%	0	0	0	0	0	0	0	0	0.00425039	0	0
Bacillus persicus nov 96.98%	0	0	0	0	0	0	0	0	0.0013524	0	0
Bacillus persicus nov 94.21%	0	0	0	0	0	0	0	0	0.000772798	0	0
Bacillus salsus nov 97.17%	0	0	0	0	0	0	0	0	0.000386399	0	0
Propionibacterium acnes nov 94.92%	0	0	0	0	0	0	0	0	0.000193199	0	0
Bacillus cellulosilyticus nov 97.01%	0	0	0	0	0	0	0	0	0	0.028306	0
Bacillus multispecies sppn8 2 nov 97.99%	0	0	0	0	0	0	0	0	0	0.00432152	0
Bacillus wakoensis	0	0	0	0	0	0	0	0	0	0.00324114	0
Bacillus cellulosilyticus nov 96.04%	0	0	0	0	0	0	0	0	0	0.00194469	0
Bacillus alkalisediminis nov 94.81%	0	0	0	0	0	0	0	0	0	0.00151253	0
Bacillus multispecies sppn8 2 nov 96.81%	0	0	0	0	0	0	0	0	0	0.00151253	0
Ornithinibacillus halophilus nov 95.89%	0	0	0	0	0	0	0	0	0	0.00108038	0
Bacillus alkalinitrilicus nov 95.22%	0	0	0	0	0	0	0	0	0	0.000648228	0
Bacillus alkalisediminis nov 95.78%	0	0	0	0	0	0	0	0	0	0.000648228	0
Bacillus cellulosilyticus nov 95.62%	0	0	0	0	0	0	0	0	0	0.000648228	0
Bacillus wakoensis nov 97.60%	0	0	0	0	0	0	0	0	0	0.000648228	0
Bacillus alkalisediminis nov 96.18%	0	0	0	0	0	0	0	0	0	0.000432152	0
Bacillus cellulosilyticus nov 95.82%	0	0	0	0	0	0	0	0	0	0.000432152	0
Bacillus multispecies sppn8 2 nov 96.79%	0	0	0	0	0	0	0	0	0	0.000432152	0
Bacillus alkalisediminis nov 96.39%	0	0	0	0	0	0	0	0	0	0.000216076	0
Bacillus cellulosilyticus nov 95.20%	0	0	0	0	0	0	0	0	0	0.000216076	0
Bacillus multispecies sppn8 2 nov 97.19%	0	0	0	0	0	0	0	0	0	0.000216076	0
Bacillus multispecies sppn8 2 nov 97.60%	0	0	0	0	0	0	0	0	0	0.000216076	0
Virgibacillus kekensis nov 93.58%	0	0	0	0	0	0	0	0	0	0.000216076	0
Geobacillus thermantarcticus nov 84.63%	0	0	0	0	0	0	0	0	0	0	0.000130924
Ruminococcaceae_[G-2] sp. oral taxon 085 nov 89.45%	0	0	0	0	0	0	0	0	0	0	0.000130924
Paracoccus aestuarii	0	0	0	0	0	0	0	0	0	0	0.000130924
multigenus multispecies sppn8 4 nov 93.44%	0	0	0	0	0	0	0	0	0	0	0.000130924
Number of species identified	28	38	43	32	139	129	121	95	10	23	10
