# Supplementary material for: Differences in the Bacteriome of Smokeless Tobacco Products with Different Oral Carcinogenicity: Compositional and Predicted Functional Analysis
Source: Preprints.org preprint supplement (doi:10.20944/preprints201703.0030.v1), 2017-03-06
Supplement: Supplementary file 2 [file ST1.xlsx]

## Sheet: List of all phyla
Phylum	A1	A2	A3	A4	S1	S2	S3	SuT	BS	YS	GS
Firmicutes	0.996727	0.99835	0.99815	0.997339	0.670495	0.0360779	0.0139834	0.86755	0.999614	1	0.998036
Proteobacteria	0.00163628	0.00109971	0.000739919	0.00199601	0.262809	0.722564	0.707294	0.0264901	0.000193199	0	0.00130924
Actinobacteria	0.00163628	0.000366569	0.000369959	0.000665336	0.0419611	0.134255	0.147581	0.101545	0.000193199	0	0.000130924
Deinococcus-Thermus	0	0.000183284	0	0	0.00132509	0	0.00396825	0	0	0	0
Cyanobacteria	0	0	0.000369959	0	0.00795053	0.0437461	0.0922147	0.000883002	0	0	0.000523697
Saccharibacteria_(TM7)	0	0	0.000369959	0	0.00110424	0	0	0	0	0	0
Bacteroidetes	0	0	0	0	0.00839223	0.0360779	0.015873	0.00353201	0	0	0
Chloroflexi	0	0	0	0	0.00485866	0.0157134	0.00699169	0	0	0	0
Spirochaetes	0	0	0	0	0.000662544	0.00150849	0	0	0	0	0
Fusobacteria	0	0	0	0	0.000441696	0.0100566	0.0115268	0	0	0	0
Planctomycetes	0	0	0	0	0	0	0.000566893	0	0	0	0
Number of Phyla detected	3	3	5	3	10	8	9	5	3	1	3
