# Supplementary material for: Differences in the Bacteriome of Smokeless Tobacco Products with Different Oral Carcinogenicity: Compositional and Predicted Functional Analysis
Source: Preprints.org preprint supplement (doi:10.20944/preprints201703.0030.v1), 2017-03-06
Supplement: Supplementary file 3 [file ST2.xlsx]

## Sheet: All genera list
Genus	A1	A2	A3	A4	S1	S2	S3	SuT	BS	YS	GS
Bacillus	0.989949	0.0254765	0.0917499	0.239521	0.16917	0	0	0.0304636	0.999614	0.998704	0.997774
Marinilactibacillus	0.00444133	0.00678152	0.00628931	0.00465735	0.00331272	0	0	0	0	0	0
Streptococcus	0.00187003	0	0	0	0.00110424	0.00276556	0	0	0	0	0
Kocuria	0.000935016	0	0	0	0.00331272	0.00364551	0	0.000441501	0	0	0
Paracoccus	0.000701262	0	0	0	0	0.00804525	0.0260771	0.000883002	0	0	0.000130924
Neisseria	0.000467508	0	0	0	0.000883392	0.000502828	0.000188964	0	0	0	0
Aggregatibacter	0.000467508	0	0	0	0	0.00125707	0	0	0	0	0
Veillonella	0.000233754	0	0	0	0	0.00138278	0.000755858	0	0	0	0
Abiotrophia	0.000233754	0	0	0	0	0	0	0	0	0	0
Janibacter	0.000233754	0	0	0	0	0	0	0	0	0	0
Paenibacillus	0	0.956562	0.245653	0.000665336	0.000662544	0	0	0.00220751	0	0	0
Terribacillus	0	0.00843109	0.036626	0.0276114	0.0192138	0	0	0.000441501	0	0	0
Tetragenococcus	0	0.000916422	0.00850906	0.00332668	0.00198763	0	0	0	0	0	0
Massilia	0	0.000549853	0.000369959	0.00133067	0.0722173	0.219862	0.14966	0	0	0	0.000654622
Pseudomonas	0	0.000366569	0	0.000665336	0.0878975	0.236204	0.111111	0.0013245	0.000193199	0	0.000392773
Micrococcus	0	0.000183284	0	0	0.00132509	0.00163419	0.0026455	0	0	0	0
Corynebacterium	0.000467508	0.000183284	0.000369959	0.000332668	0.00287102	0.00917662	0.00718065	0.0865342	0	0	0
Thermus	0	0.000183284	0	0	0.000441696	0	0	0	0	0	0
Staphylococcus	0	0.000183284	0	0	0.000220848	0.000251414	0.000188964	0.0013245	0	0	0
Castellaniella	0	0.000183284	0	0	0	0	0	0	0	0	0
Oceanobacillus	0	0	0.608953	0.719561	0.452518	0	0	0.0406181	0	0	0
Gloeothece	0	0	0.000369959	0	0.00618375	0.0437461	0.074452	0.000441501	0	0	0.000523697
TM7_[G-1]	0	0	0.000369959	0	0.00110424	0	0	0	0	0	0
Citrobacter	0	0	0.000369959	0	0	0	0	0	0	0	0
Psychrobacillus	0	0	0.000369959	0	0	0	0	0	0	0	0
Ornithinibacillus	0	0	0	0.00199601	0.00242933	0	0	0.00220751	0	0.00108038	0
Brachybacterium	0	0	0	0.000332668	0	0	0.00245654	0.00264901	0	0	0
Moraxella	0	0	0	0	0.0295936	0	0.00963719	0	0	0	0
Propionibacterium	0	0	0	0	0.0150177	0.0546826	0.0922147	0.000441501	0.000193199	0	0.000130924
Acinetobacter	0	0	0	0	0.00905477	0.0266499	0.0207861	0	0	0	0
Burkholderia	0	0	0	0	0.00839223	0.00779384	0	0	0	0	0
Oscillibacter	0	0	0	0	0.00772968	0	0.000566893	0	0	0	0
Sphingomonas	0	0	0	0	0.00750883	0.0267756	0.0495087	0	0	0	0
Candidatus Puniceispirillum	0	0	0	0	0.00618375	0.0346952	0.186697	0	0	0	0
Brevundimonas	0	0	0	0	0.0059629	0	0	0	0	0	0
Methylobacterium	0	0	0	0	0.0055212	0.027027	0.0459184	0	0	0	0
Faecalibacterium	0	0	0	0	0.0055212	0.00113136	0.00396825	0	0	0	0
Herpetosiphon	0	0	0	0	0.00441696	0.0113136	0	0	0	0	0
Sphingobium	0	0	0	0	0.00419611	0	0	0	0	0	0
Brevibacterium	0	0	0	0	0.00353357	0	0	0.0013245	0	0	0
Chryseobacterium	0	0	0	0	0.00331272	0.00867379	0.00547997	0	0	0	0
Rhodopseudomonas	0	0	0	0	0.00331272	0	0.00396825	0	0	0	0
Delftia	0	0	0	0	0.00309187	0.0106851	0.00529101	0	0	0	0
Enhydrobacter	0	0	0	0	0.00287102	0	0.00396825	0	0	0	0
Rothia	0	0	0	0	0.00265018	0.0121936	0.00434618	0	0	0	0
Rugamonas	0	0	0	0	0.00265018	0.00515399	0.00888133	0	0	0	0
Escherichia	0	0	0	0	0.00242933	0.00125707	0.000566893	0	0	0	0
Solobacterium	0	0	0	0	0.00242933	0.000125707	0	0	0	0	0
Alteromonas	0	0	0	0	0.00242933	0	0	0	0	0	0
Pantoea	0	0	0	0	0.00220848	0.000502828	0.00132275	0	0	0	0
Arthrobacter	0	0	0	0	0.00198763	0.0017599	0	0.000883002	0	0	0
Ruminoclostridium	0	0	0	0	0.00198763	0	0	0	0	0	0
Georgenia	0	0	0	0	0.00176678	0.00163419	0	0	0	0	0
Trichormus	0	0	0	0	0.00176678	0	0.0109599	0	0	0	0
Friedmanniella	0	0	0	0	0.00176678	0	0.00359033	0	0	0	0
Ralstonia	0	0	0	0	0.00176678	0	0.00661376	0	0	0	0
Stenotrophomonas	0	0	0	0	0.00154594	0.00854808	0.00699169	0	0	0	0
Bergeyella	0	0	0	0	0.00154594	0.00477687	0	0	0	0	0
Dermacoccus	0	0	0	0	0.00154594	0.00113136	0	0	0	0	0
Acidovorax	0	0	0	0	0.00132509	0.00502828	0	0	0	0	0
Ferruginibacter	0	0	0	0	0.00132509	0.000754243	0	0	0	0	0
Cloacibacterium	0	0	0	0	0.00110424	0.0100566	0.0032124	0	0	0	0
Microbacterium	0	0	0	0	0.000883392	0.00980515	0.00491308	0	0	0	0
Nitrosomonas	0	0	0	0	0.000883392	0.00515399	0.010393	0	0	0	0
Cryptosporangium	0	0	0	0	0.000883392	0	0	0	0	0	0
Deinococcus	0	0	0	0	0.000883392	0	0	0	0	0	0
Knoellia	0	0	0	0	0.000883392	0	0	0	0	0	0
Gordonia	0	0	0	0	0.000662544	0.0109365	0.00566893	0	0	0	0
Treponema	0	0	0	0	0.000662544	0.00150849	0	0	0	0	0
Actinomyces	0	0	0	0	0.000662544	0	0.000377929	0	0	0	0
Finegoldia	0	0	0	0	0.000662544	0	0	0	0	0	0
Geodermatophilus	0	0	0	0	0.000662544	0	0	0	0	0	0
Nocardiopsis	0	0	0	0	0.000662544	0	0	0	0	0	0
Peptoniphilus	0	0	0	0	0.000662544	0	0	0	0	0	0
Fusobacterium	0	0	0	0	0.000441696	0.00653677	0	0	0	0	0
Dehalococcoides	0	0	0	0	0.000441696	0.00238843	0	0	0	0	0
Sphingobacterium	0	0	0	0	0.000441696	0	0	0.00353201	0	0	0
Cryobacterium	0	0	0	0	0.000441696	0	0	0	0	0	0
Dorea	0	0	0	0	0.000441696	0	0	0	0	0	0
Weeksella	0	0	0	0	0.000441696	0	0	0	0	0	0
Atopostipes	0	0	0	0	0.000220848	0.00364551	0	0.0671082	0	0	0
Comamonas	0	0	0	0	0.000220848	0.00276556	0	0	0	0	0
Achromobacter	0	0	0	0	0.000220848	0.00138278	0	0	0	0	0
Capnocytophaga	0	0	0	0	0.000220848	0	0.00377929	0	0	0	0
Lautropia	0	0	0	0	0.000220848	0	0.00226757	0	0	0	0
Curtobacterium	0	0	0	0	0.000220848	0	0.00188964	0	0	0	0
Oceanitalea	0	0	0	0	0.000220848	0	0	0.00485651	0	0	0
Azospirillum	0	0	0	0	0.000220848	0	0	0	0	0	0
Catenibacterium	0	0	0	0	0.000220848	0	0	0	0	0	0
Bradyrhizobium	0	0	0	0	0	0.0245129	0.0151172	0	0	0	0
Paenirhodobacter	0	0	0	0	0	0.0148334	0	0	0	0	0
Blastococcus	0	0	0	0	0	0.0125707	0.000755858	0	0	0	0
Hephaestia	0	0	0	0	0	0.0121936	0	0	0	0	0
Terrisporobacter	0	0	0	0	0	0.0115651	0	0	0	0	0
Roseomonas	0	0	0	0	0	0.00867379	0	0	0	0	0
Hellea	0	0	0	0	0	0.00817096	0	0	0	0	0
Coprococcus	0	0	0	0	0	0.00754243	0	0	0	0	0
Empedobacter	0	0	0	0	0	0.0052797	0	0	0	0	0
Bosea	0	0	0	0	0	0.00502828	0	0	0	0	0
Cupriavidus	0	0	0	0	0	0.00477687	0	0	0	0	0
Prevotella	0	0	0	0	0	0.00465116	0.000188964	0	0	0	0
Neorhizobium	0	0	0	0	0	0.00427404	0	0	0	0	0
Tetrasphaera	0	0	0	0	0	0.00364551	0	0.000441501	0	0	0
Azonexus	0	0	0	0	0	0.00364551	0	0	0	0	0
Leptotrichia	0	0	0	0	0	0.0035198	0.0115268	0	0	0	0
Mycobacterium	0	0	0	0	0	0.00263985	0.000188964	0	0	0	0
Sporobacter	0	0	0	0	0	0.00263985	0	0	0	0	0
Haemophilus	0	0	0	0	0	0.00238843	0.000944822	0	0	0	0
Vallitalea	0	0	0	0	0	0.00238843	0	0	0	0	0
Dehalogenimonas	0	0	0	0	0	0.00201131	0	0	0	0	0
Acidimicrobium	0	0	0	0	0	0.00188561	0	0	0	0	0
Aquipuribacter	0	0	0	0	0	0.0017599	0.00453515	0	0	0	0
Eikenella	0	0	0	0	0	0.00163419	0	0	0	0	0
Flexivirga	0	0	0	0	0	0.00163419	0	0	0	0	0
Nocardioides	0	0	0	0	0	0.00163419	0	0	0	0	0
Anaerocella	0	0	0	0	0	0.00150849	0	0	0	0	0
Intestinimonas	0	0	0	0	0	0.00113136	0.00113379	0	0	0	0
Erythrobacter	0	0	0	0	0	0.00113136	0	0	0	0	0
Ruminococcaceae_[G-2]	0	0	0	0	0	0.00100566	0.0032124	0	0	0	0.000130924
Klebsiella	0	0	0	0	0	0.00087995	0	0	0	0	0
Ottowia	0	0	0	0	0	0.000754243	0	0	0	0	0
Sporichthya	0	0	0	0	0	0.000754243	0	0	0	0	0
Terrabacter	0	0	0	0	0	0.000628536	0	0	0	0	0
Aciditerrimonas	0	0	0	0	0	0.000502828	0	0	0	0	0
Alloiococcus	0	0	0	0	0	0.000377121	0	0	0	0	0
Bacteroidetes_[G-7]	0	0	0	0	0	0.000377121	0	0	0	0	0
Aeromonas	0	0	0	0	0	0.000251414	0	0	0	0	0
Marinomonas	0	0	0	0	0	0.000125707	0.000755858	0	0	0	0
Kurthia	0	0	0	0	0	0.000125707	0	0	0	0	0
Streptomyces	0	0	0	0	0	0	0.0120937	0	0	0	0
Nisaea	0	0	0	0	0	0	0.0117158	0	0	0	0
Pelagibacter	0	0	0	0	0	0	0.00982615	0	0	0	0
Tepidicella	0	0	0	0	0	0	0.00963719	0	0	0	0
Sphaerobacter	0	0	0	0	0	0	0.00699169	0	0	0	0
Synechococcus	0	0	0	0	0	0	0.00680272	0.000441501	0	0	0
Ideonella	0	0	0	0	0	0	0.00415722	0	0	0	0
Truepera	0	0	0	0	0	0	0.00396825	0	0	0	0
Nocardia	0	0	0	0	0	0	0.00207861	0	0	0	0
Alistipes	0	0	0	0	0	0	0.00188964	0	0	0	0
Microvirga	0	0	0	0	0	0	0.00188964	0	0	0	0
Algibacter	0	0	0	0	0	0	0.00132275	0	0	0	0
Beijerinckia	0	0	0	0	0	0	0.00113379	0	0	0	0
Branchiibius	0	0	0	0	0	0	0.00113379	0	0	0	0
Aerococcus	0	0	0	0	0	0	0.000944822	0	0	0	0
Hathewaya	0	0	0	0	0	0	0.000944822	0	0	0	0
Lacnoclostridium	0	0	0	0	0	0	0.000944822	0	0	0	0
Alcaligenes	0	0	0	0	0	0	0.000755858	0.000441501	0	0	0
Pectobacterium	0	0	0	0	0	0	0.000755858	0	0	0	0
Phascolarctobacterium	0	0	0	0	0	0	0.000755858	0	0	0	0
Slackia	0	0	0	0	0	0	0.000755858	0	0	0	0
Aquihabitans	0	0	0	0	0	0	0.000566893	0	0	0	0
Eubacterium	0	0	0	0	0	0	0.000377929	0	0	0	0
Pirellula	0	0	0	0	0	0	0.000377929	0	0	0	0
Rosenbergiella	0	0	0	0	0	0	0.000377929	0	0	0	0
Cardiobacterium	0	0	0	0	0	0	0.000188964	0	0	0	0
Catonella	0	0	0	0	0	0	0.000188964	0	0	0	0
Gimesia	0	0	0	0	0	0	0.000188964	0	0	0	0
Raoultella	0	0	0	0	0	0	0.000188964	0	0	0	0
Solirubrobacter	0	0	0	0	0	0	0.000188964	0	0	0	0
Desemzia	0	0	0	0	0	0	0	0.416777	0	0	0
Lysinibacillus	0	0	0	0	0	0	0	0.161148	0	0	0
Facklamia	0	0	0	0	0	0	0	0.13245	0	0	0
Lysobacter	0	0	0	0	0	0	0	0.0136865	0	0	0
Sporosarcina	0	0	0	0	0	0	0	0.00838852	0	0	0
Ochrobactrum	0	0	0	0	0	0	0	0.00529801	0	0	0
Atopococcus	0	0	0	0	0	0	0	0.00397351	0	0	0
Enteractinococcus	0	0	0	0	0	0	0	0.00353201	0	0	0
Luteimonas	0	0	0	0	0	0	0	0.000883002	0	0	0
Parapusillimonas	0	0	0	0	0	0	0	0.000883002	0	0	0
Pelagibacterium	0	0	0	0	0	0	0	0.000883002	0	0	0
Tistlia	0	0	0	0	0	0	0	0.000883002	0	0	0
Aureimonas	0	0	0	0	0	0	0	0.000441501	0	0	0
Devosia	0	0	0	0	0	0	0	0.000441501	0	0	0
Halomonas	0	0	0	0	0	0	0	0.000441501	0	0	0
Lacticigenium	0	0	0	0	0	0	0	0.000441501	0	0	0
Leucobacter	0	0	0	0	0	0	0	0.000441501	0	0	0
Virgibacillus	0	0	0	0	0	0	0	0	0	0.000216076	0
Geobacillus	0	0	0	0	0	0	0	0	0	0	0.000130924
multigenus	0	0	0	0	0	0	0	0	0	0	0.000130924
Number of genera detected	10	12	11	10	80	84	78	38	3	3	9
